# Supplementary material for: Association between marital status and all-cause mortality of patients with metastatic breast cancer: a population-based study
Source: PubMed Central journal article supplement (PMC10241782; doi:10.1038/s41598-023-36139-8), 2023-06-05
Supplement: 41598_2023_36139_MOESM1_ESM.pdf [file 41598_2023_36139_MOESM1_ESM.pdf]

# **Association of marital status and all-cause mortality of metastatic breast cancer patients: A population-based study**

## **Supplementary materials**

**Table 1** Gray's test and Fine–Gray proportional subdistribution hazard method analysis of breast cancer-specific survival (BCSS) for patients with metastatic breast cancer, and sensitivity analysis.

**Figure. S1** Percentage of missing variables.

**Figure. S2** Kaplan-Meier survival curves of overall survival(A) and breast cancer-specific survival(B) on sensitivity analysis. We excluded all patients with missing covariable data (n=3744) and those who survived less than 1 month (n=792) after diagnosis. The final sample size for inclusion in the sensitivity analysis was 11977 patients, 5616 married and 6361 unmarried patients.

**Figure. S3** Kaplan-Meier survival curves of breast cancer-specific survival (BCSS) in different distant organ metastasis subgroup (A: without distant organ metastasis; B: bone metastasis; C: liver metastasis; D: brain metastasis; E: lung metastasis; F: multiple organ metastasis) and overall survival (OS) in different distant organ metastasis subgroup (G: without distant organ metastasis; H: bone metastasis; I: liver metastasis; J: brain metastasis; K: lung metastasis; L:multiple organ metastasis) MBC patients according to marital status.

**Table S1** Gray's test and Fine–Gray proportional subdistribution hazard method analysis of breast cancer-specific survival (BCSS) for patients with metastatic breast cancer, and sensitivity analysis.

| Characteristic (n)        | Univariable analysis |                 | Multivariable analysis |                 |
|---------------------------|----------------------|-----------------|------------------------|-----------------|
|                           | Gray's test          | <i>p</i> -value | SHR (95% CI)           | <i>p</i> -value |
| <b>BCSS</b>               |                      |                 |                        |                 |
| <b>Marital status</b>     | 118.579              | <0.001          |                        | <0.001          |
| Unmarried (8949)          |                      |                 | Reference              |                 |
| Married (7564)            |                      |                 | 0.840 (0.799-0.883)    |                 |
| <b>Ages</b>               | 12.086               | 0.001           |                        | 0.845           |
| <65 (9811)                |                      |                 | Reference              |                 |
| >=65 (6702)               |                      |                 | 1.005 (0.954-1.060)    |                 |
| <b>Race</b>               | 75.228               | <0.001          |                        | <0.001          |
| White (12407)             |                      |                 | Reference              |                 |
| Black (2764)              |                      |                 | 1.168 (1.095-1.245)    | <0.001          |
| Other (1296)              |                      |                 | 1.016 (0.929-1.112)    | 0.727           |
| Unknown (46)              |                      |                 | 0.500 (0.245-1.022)    | 0.057           |
| <b>Grade</b>              | 262.687              | <0.001          |                        | <0.001          |
| I (1170)                  |                      |                 | Reference              |                 |
| II (6017)                 |                      |                 | 1.331 (1.194-1.483)    | <0.001          |
| III (6755)                |                      |                 | 1.809 (1.621-2.020)    | <0.001          |
| IV (99)                   |                      |                 | 2.240 (1.685-2.979)    | <0.001          |
| Unknown (2472)            |                      |                 | 1.499 (1.330-1.669)    | <0.001          |
| <b>Subtype</b>            | 622.276              | <0.001          |                        | <0.001          |
| HR(-) & HER2(-) (2018)    |                      |                 | Reference              |                 |
| HR(-) & HER2(+) (1306)    |                      |                 | 0.500 (0.448-0.558)    | <0.001          |
| HR(+) & HER2(-) (9201)    |                      |                 | 0.496 (0.458-0.536)    | <0.001          |
| HR(+) & HER2(+)<br>(2489) |                      |                 | 0.418 (0.381-0.458)    | <0.001          |

|                                 |         |        |                     |        |
|---------------------------------|---------|--------|---------------------|--------|
| Unknown (1499)                  |         |        | 0.565 (0.506-0.630) | <0.001 |
| <b>Chemotherapy</b>             | 76.829  | <0.001 |                     | <0.001 |
| No (7465)                       |         |        | Reference           |        |
| Yes (9048)                      |         |        | 0.845 (0.798-0.894) |        |
| <b>Radiation</b>                | 18.592  | <0.001 |                     | NI     |
| No (10937)                      |         |        |                     |        |
| Yes (5207)                      |         |        |                     |        |
| Unknown (369)                   |         |        |                     |        |
| <b>Surgery</b>                  | 462.431 | <0.001 |                     | <0.001 |
| No surgery (10951)              |         |        | Reference           |        |
| Partial mastectomy (1554)       |         |        | 0.629 (0.575-0.688) | <0.001 |
| Simple mastectomy (1308)        |         |        | 0.581 (0.526-0.642) | <0.001 |
| Radical mastectomy (2542)       |         |        | 0.734 (0.685-0.785) | <0.001 |
| Unknown (158)                   |         |        | 1.021 (0.823-1.266) | 0.850  |
| <b>Distant organ metastasis</b> | 702.044 | <0.001 |                     | <0.001 |
| No (1990)                       |         |        | Reference           |        |
| One site (9374)                 |         |        | 1.246 (1.147-1.354) | <0.001 |
| Multiple sites (4959)           |         |        | 1.937 (1.774-2.115) | <0.001 |
| Unknown (190)                   |         |        | 1.393 (1.109-1.748) | 0.004  |

---

*Note: Distant organ metastasis only included bone, liver, lung, and brain metastases in the SEER database (2010-2015). NI: not included in the multivariable survival analysis. SHR: subdistribution hazard ratio. Patients with an unknown cause of death were classified as dying of tumor-related-cause. There were 7484 deaths from tumors, 2519 deaths from other causes, and 6,510 survivors at the follow-up endpoint.*

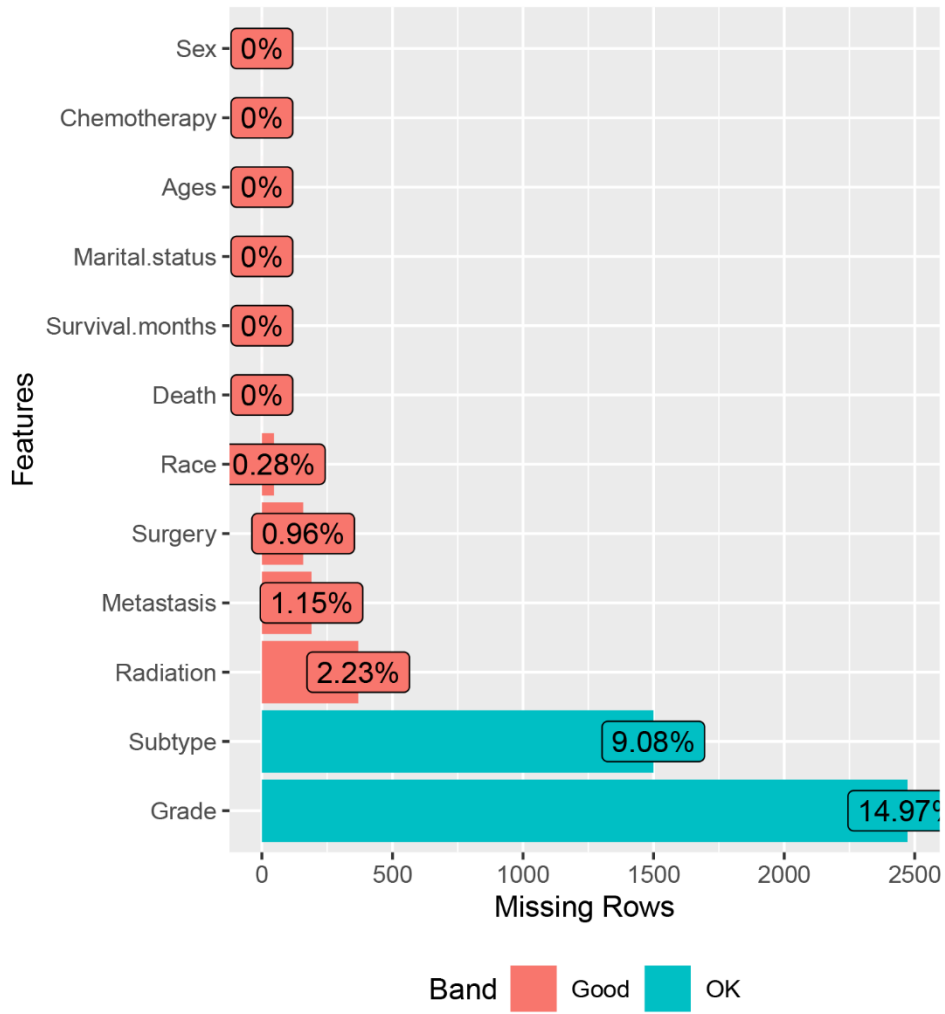

**Figure. S1** Percentage of missing variables.

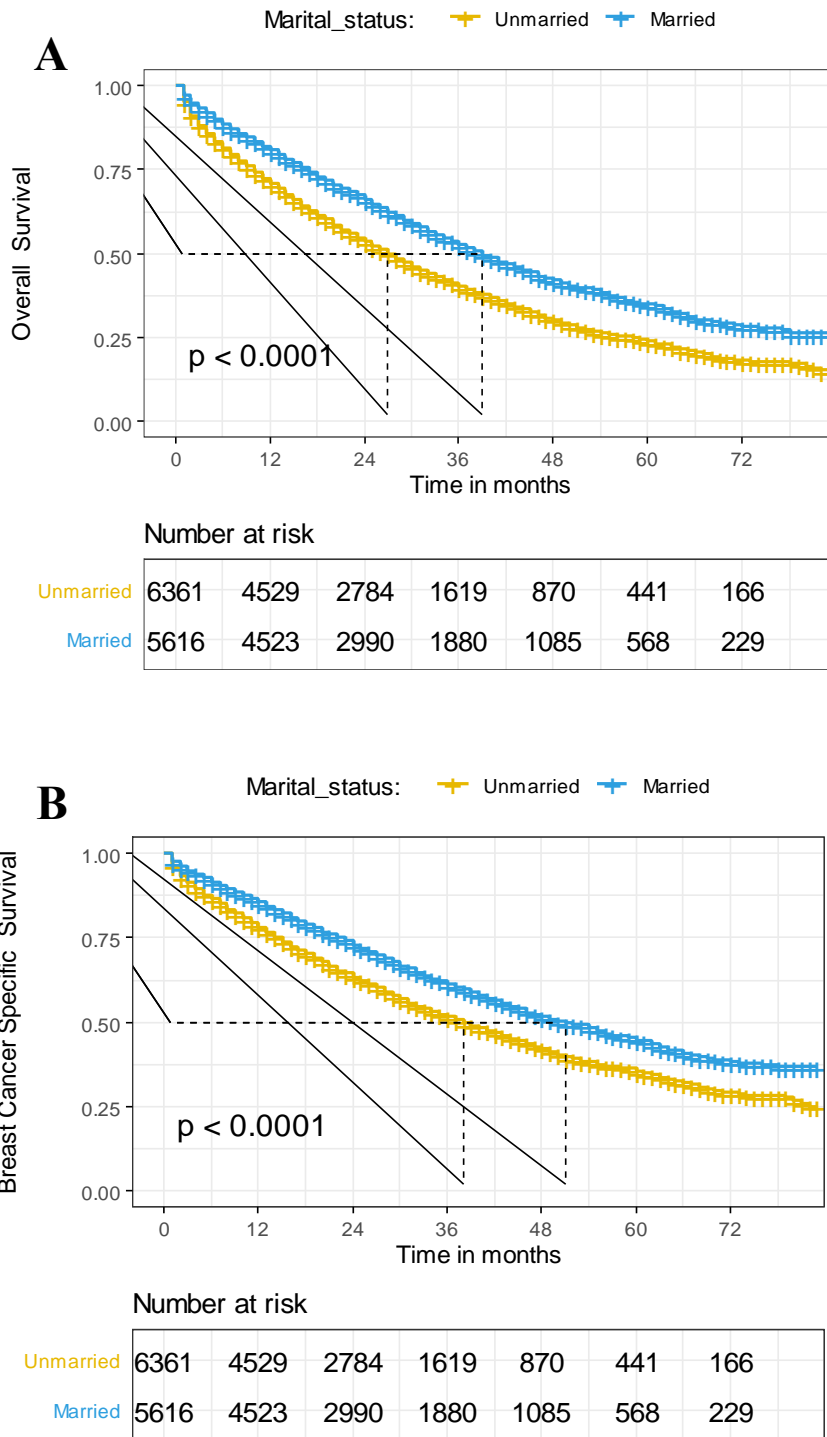

**Figure. S2** Kaplan-Meier survival curves of overall survival(A) and breast cancer-specific survival(B) on sensitivity analysis. We excluded all patients with missing covariable data (n=3744) and those who survived less than 1 month (n=792) after diagnosis. The final sample size for inclusion in the sensitivity analysis was 11977 patients, 5616 married and 6361 unmarried patients.

**A**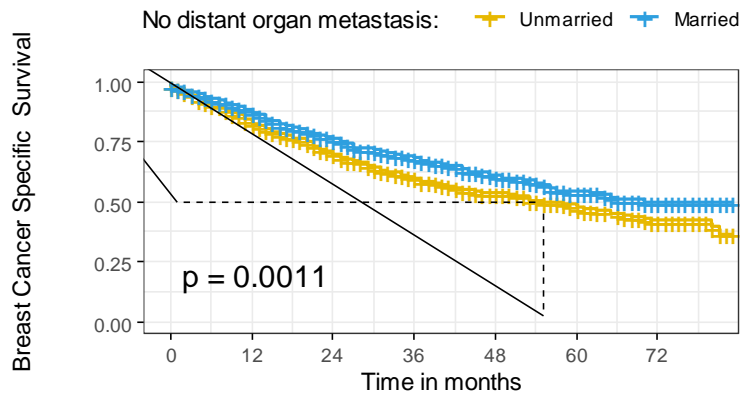

Number at risk

|           |      |     |     |     |     |     |    |
|-----------|------|-----|-----|-----|-----|-----|----|
| Unmarried | 1000 | 745 | 480 | 289 | 174 | 98  | 48 |
| Married   | 990  | 821 | 559 | 386 | 246 | 135 | 62 |

**B**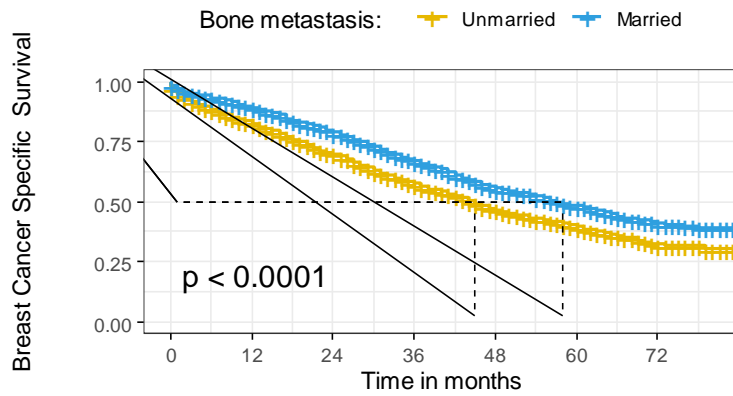

Number at risk

|           |      |      |      |      |     |     |     |
|-----------|------|------|------|------|-----|-----|-----|
| Unmarried | 3376 | 2557 | 1655 | 996  | 519 | 261 | 88  |
| Married   | 2984 | 2516 | 1727 | 1104 | 629 | 338 | 140 |

**C**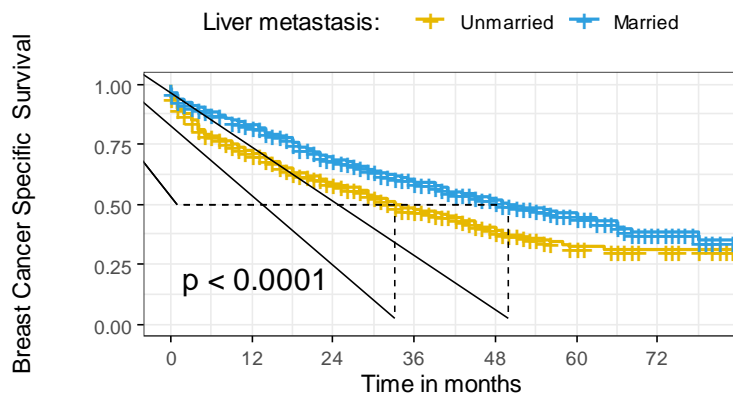

Number at risk

|           |     |     |     |     |     |    |    |
|-----------|-----|-----|-----|-----|-----|----|----|
| Unmarried | 592 | 380 | 224 | 128 | 72  | 33 | 17 |
| Married   | 574 | 436 | 298 | 198 | 120 | 57 | 21 |

**D**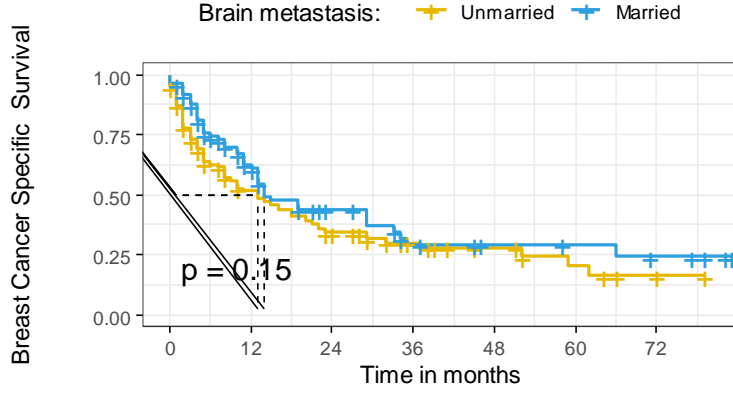

Number at risk

|           |     |    |    |    |   |   |   |
|-----------|-----|----|----|----|---|---|---|
| Unmarried | 119 | 45 | 29 | 14 | 9 | 5 | 2 |
| Married   | 83  | 41 | 20 | 10 | 7 | 6 | 4 |

**E**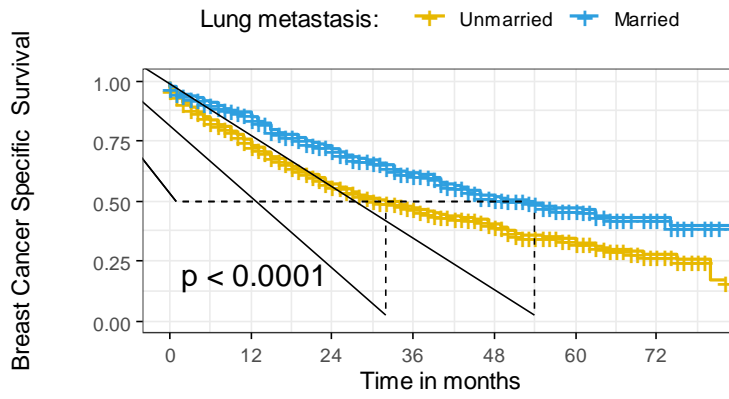

Number at risk

|           |     |     |     |     |     |    |    |
|-----------|-----|-----|-----|-----|-----|----|----|
| Unmarried | 982 | 645 | 362 | 210 | 122 | 63 | 19 |
| Married   | 664 | 520 | 330 | 194 | 106 | 49 | 19 |

**F**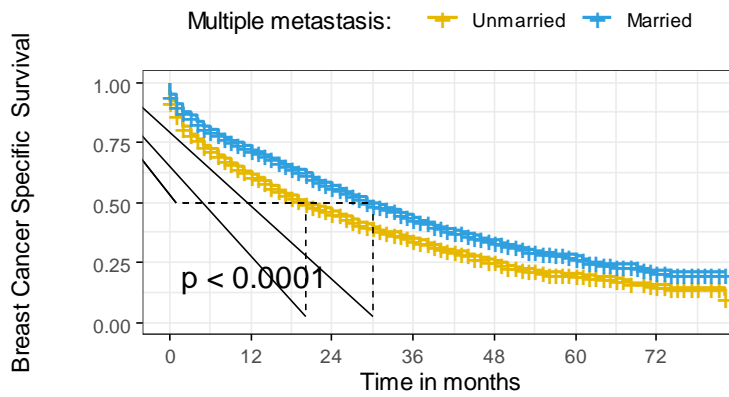

Number at risk

|           |      |      |     |     |     |     |    |
|-----------|------|------|-----|-----|-----|-----|----|
| Unmarried | 2773 | 1503 | 846 | 449 | 212 | 99  | 38 |
| Married   | 2186 | 1438 | 880 | 501 | 251 | 127 | 43 |

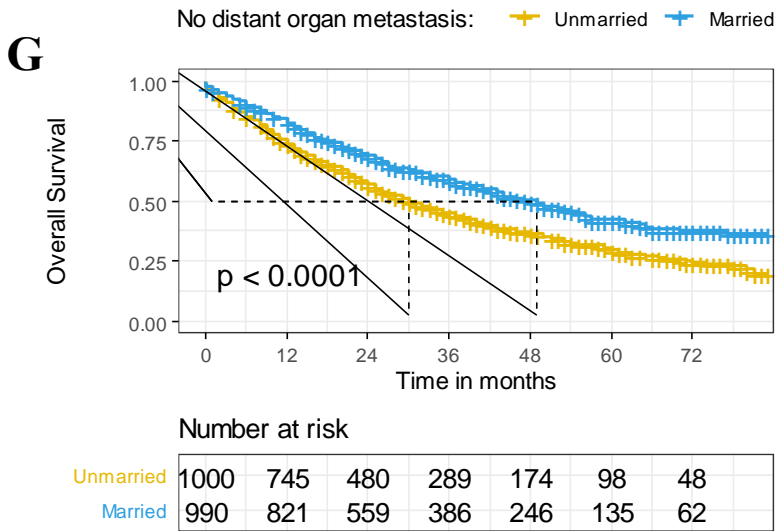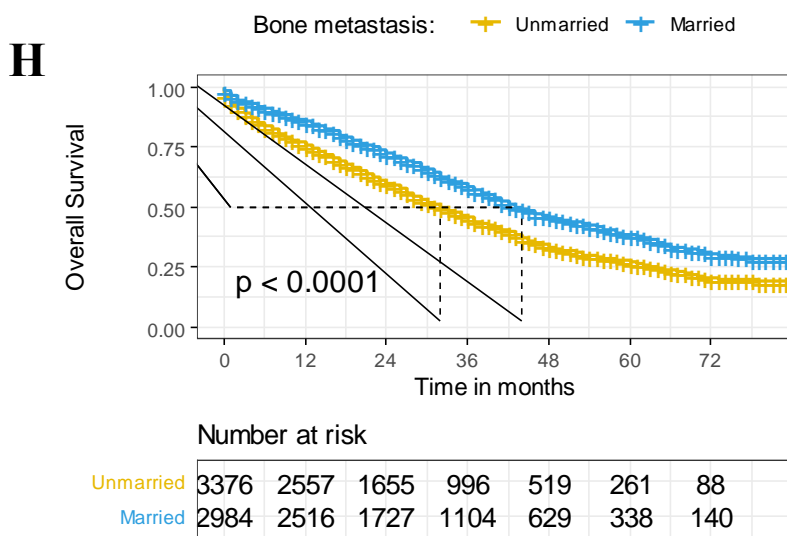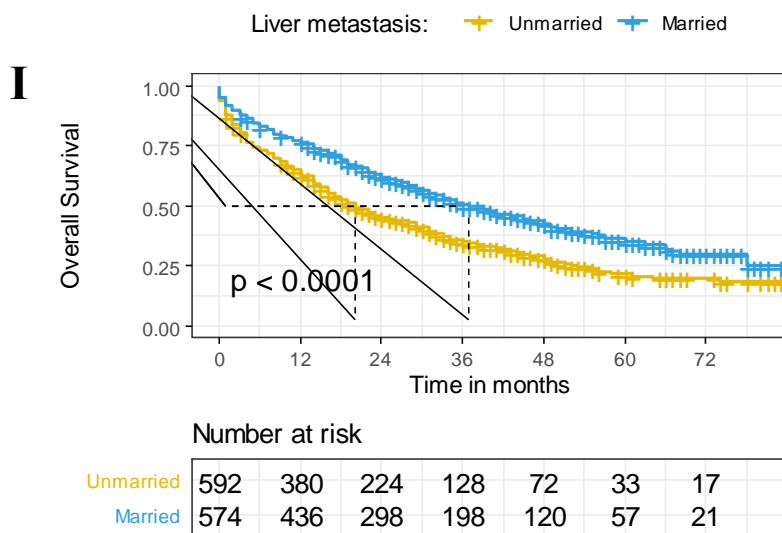



**J**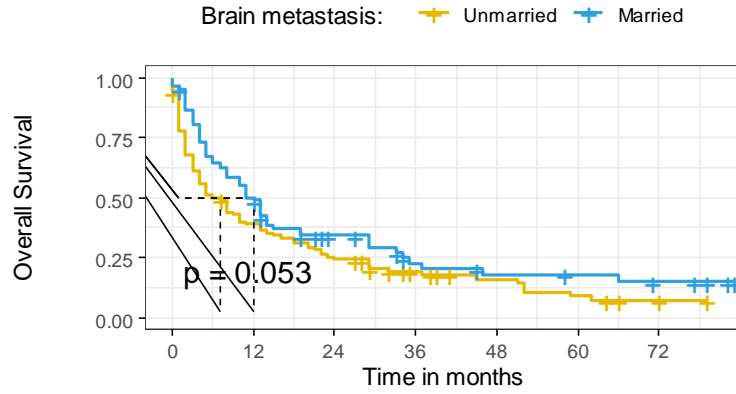

Number at risk

|           |     |    |    |    |   |   |   |
|-----------|-----|----|----|----|---|---|---|
| Unmarried | 119 | 45 | 29 | 14 | 9 | 5 | 2 |
| Married   | 83  | 41 | 20 | 10 | 7 | 6 | 4 |

**K**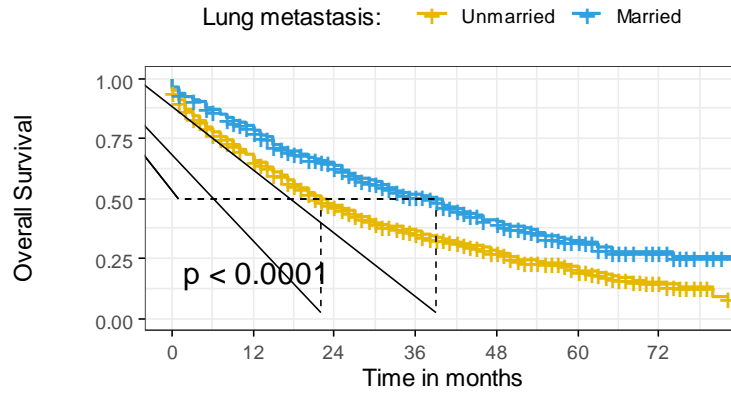

Number at risk

|           |     |     |     |     |     |    |    |
|-----------|-----|-----|-----|-----|-----|----|----|
| Unmarried | 982 | 645 | 362 | 210 | 122 | 63 | 19 |
| Married   | 664 | 520 | 330 | 194 | 106 | 49 | 19 |

**L**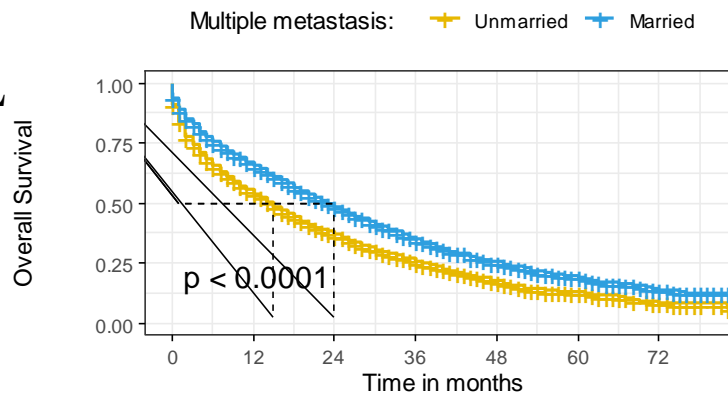

Number at risk

|           |      |      |     |     |     |     |    |
|-----------|------|------|-----|-----|-----|-----|----|
| Unmarried | 2773 | 1503 | 846 | 449 | 212 | 99  | 38 |
| Married   | 2186 | 1438 | 880 | 501 | 251 | 127 | 43 |

**Figure. S3** Kaplan-Meier survival curves of breast cancer-specific survival (BCSS) in different distant organ metastasis subgroup (A: without distant organ metastasis; B: bone metastasis; C: liver metastasis; D: brain metastasis; E: lung metastasis; F: multiple organ metastasis) and overall survival (OS) in different distant organ metastasis subgroup (G: without distant organ metastasis; H: bone metastasis; I: liver metastasis; J: brain metastasis; K: lung metastasis; L: multiple organ metastasis) MBC patients according to marital status.
